# Supplementary material for: Sandwiched C@SnO2@C hollow nanostructures as an ultralong-lifespan high-rate anode material for lithium-ion and sodium-ion batteries
Source: Royal Society of Chemistry journal article supplement (doi:10.1039/c7ta01936j), 2017-01-01
Supplement: c7ta01936j1.pdf [file c7ta01936j1.pdf]

**Electronic Supplementary Information**

**Sandwiched C@SnO<sub>2</sub>@C Hollow Nanostructures as an Ultralong-  
Lifespan High-Rate Anode Material for Lithium-Ion and Sodium-Ion  
Batteries**

Jian Qin,<sup>a</sup> Naiqin Zhao,<sup>a, b</sup> Chunsheng Shi,<sup>a</sup> Enzuo Liu,<sup>a, b</sup> Fang He,<sup>a</sup> Liying Ma,<sup>a</sup>  
Qunying Li,<sup>a</sup> Jiajun Li,<sup>a</sup> and Chunnian He\*<sup>a, b</sup>

<sup>a</sup> School of Materials Science and Engineering and Tianjin Key Laboratory of Composites and Functional Materials, Tianjin University, Tianjin, 300072, P. R. China

<sup>b</sup> Collaborative Innovation Center of Chemical Science and Engineering, Tianjin 300072, China

\* Address correspondence to

cnhe08@tju.edu.cn

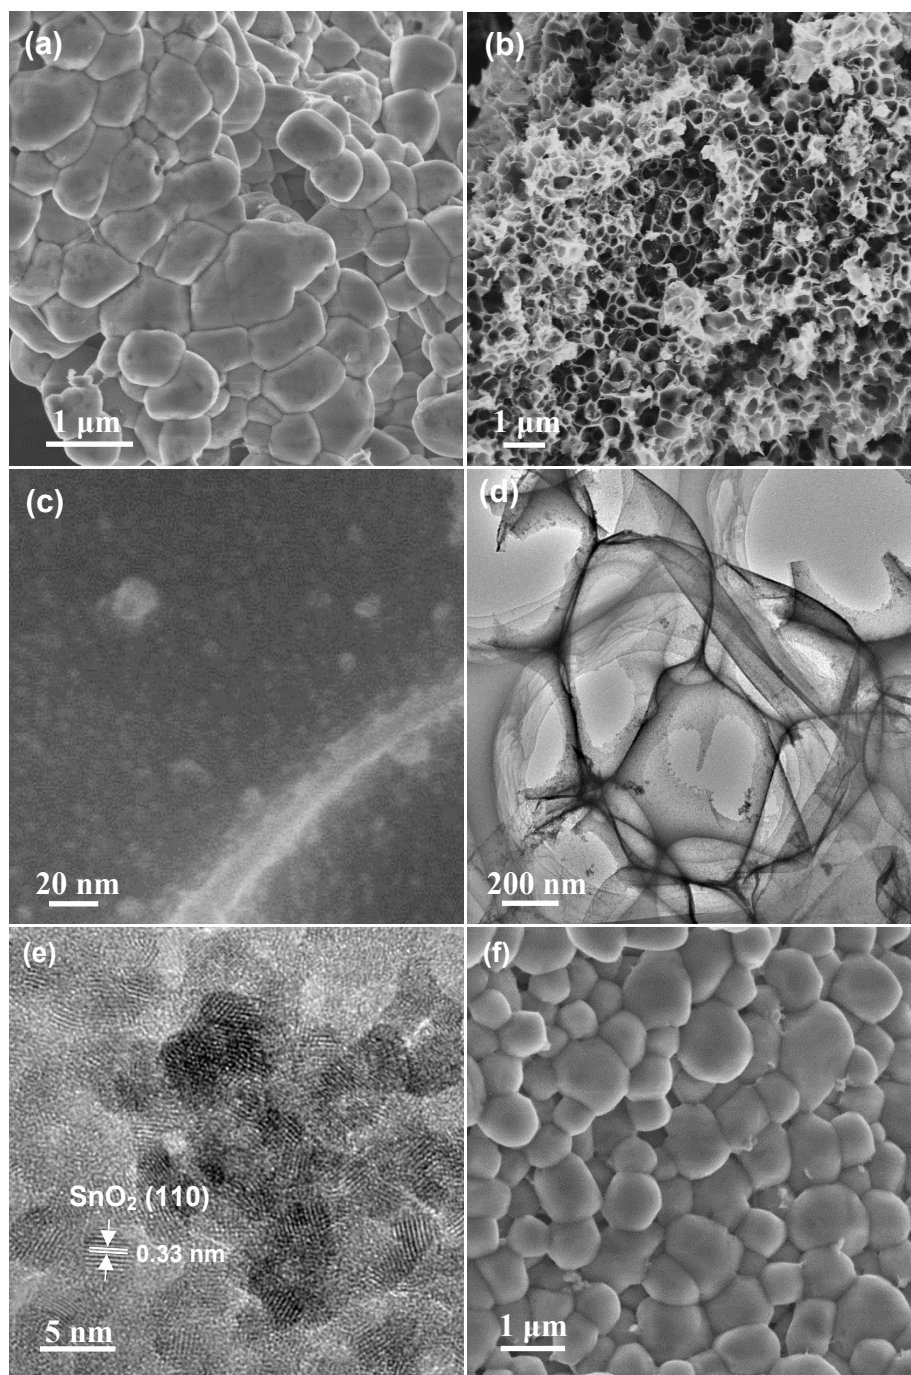

Fig. S1. (a) A typical SEM image of the 3D interconnected NaCl cubes coated with uniform thin film of SnCl<sub>4</sub>-C<sub>6</sub>H<sub>8</sub>O<sub>7</sub> complex after freeze-drying process. (b)-(c) SEM and (d)-(e) TEM images of 3D porous carbon networks homogeneously anchored with numerous ultrasmall SnO<sub>2</sub> nanocrystals of 2~5 nm (denoted with C@SnO<sub>2</sub> composites) after removing NaCl but before the CVD carbon coating process. Note

that the C@SnO<sub>2</sub> composite does not display perfectly pore structure because of some defects and fractures resulting from structural collapses of the NaCl template during the carbonization or template removal process. (g) A typical SEM image of 3D interconnected NaCl particles coated with C@SnO<sub>2</sub>@C (NaCl@C@SnO<sub>2</sub>@C) before eliminating the NaCl template.

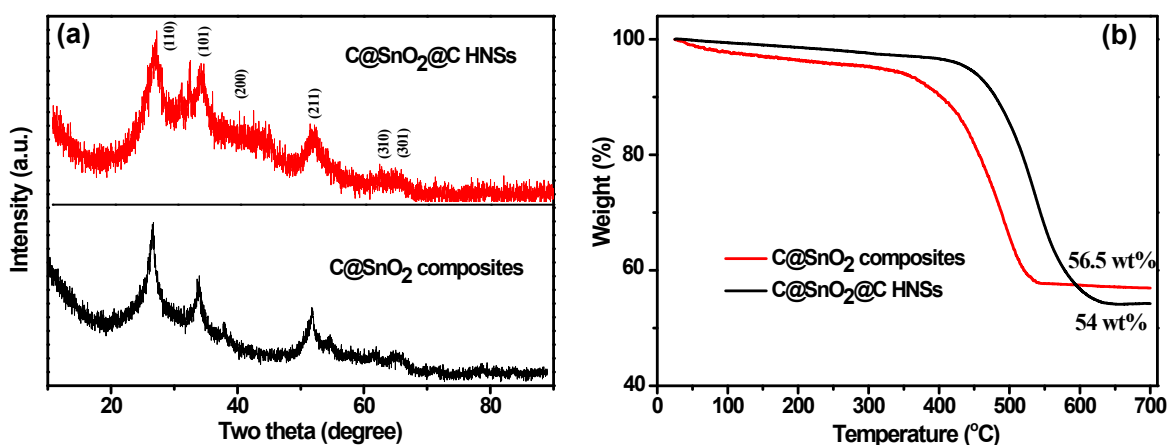

Fig. S2. (a) XRD patterns and (b) TGA profile of C@SnO<sub>2</sub>@C HNSs and C@SnO<sub>2</sub> composite. It can be seen that the diffraction peaks of C@SnO<sub>2</sub> composites can be well indexed to the tetragonal SnO<sub>2</sub> phase (JCPDS 41-1445) and the C@SnO<sub>2</sub> composites contains 43.5 wt.% carbon without the CVD carbon coating process.

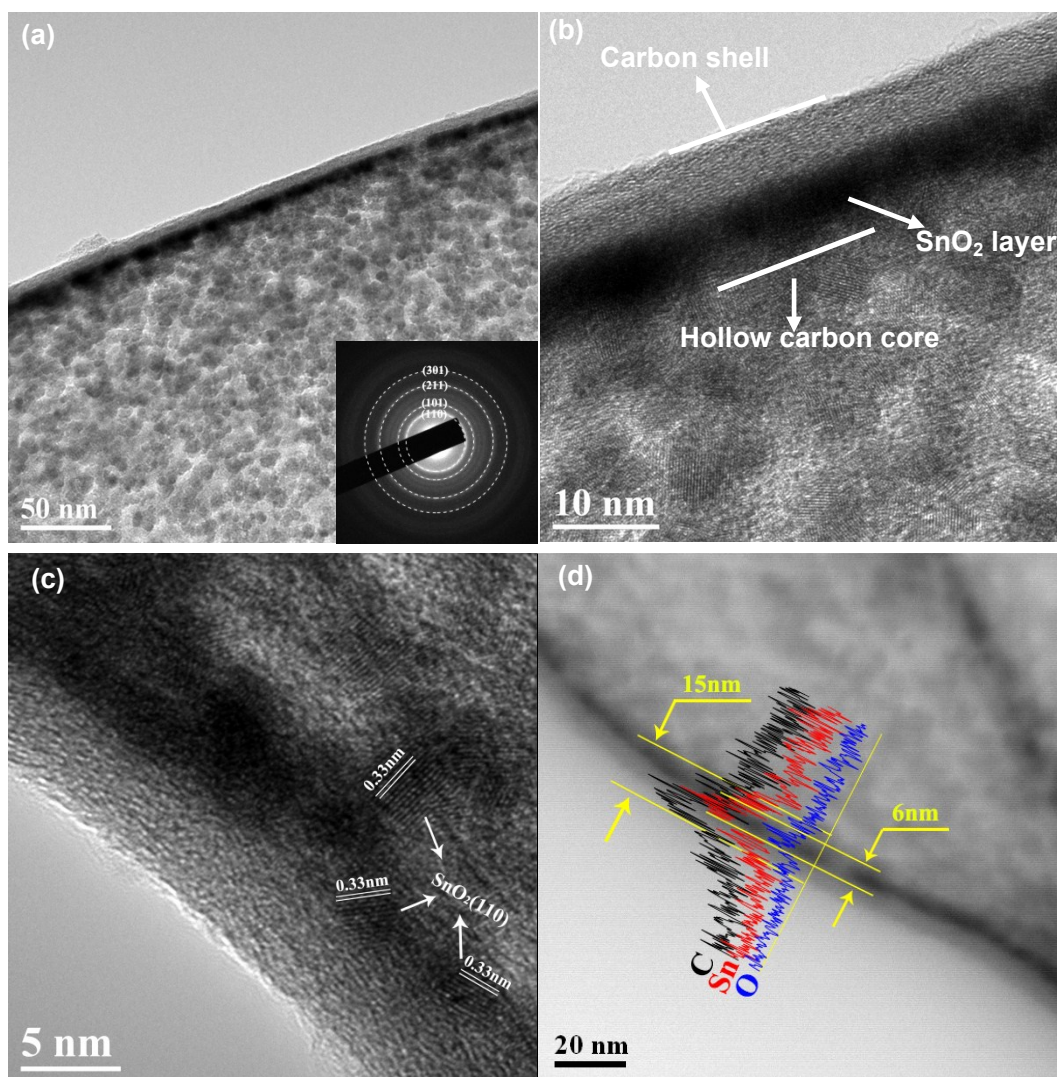

Fig. S3. (a) TEM image and SEAD pattern, (b, c) HRTEM images, (d) elemental line scanning image of the C@SnO<sub>2</sub>@C HNSs composite, in which a definite composition order of the shells is confirmed. The outer carbon shell, which derived from the CVD of C<sub>2</sub>H<sub>2</sub>, shows a clear profile both in HRTEM and elemental line scanning images and its thickness is about 5 nm. The interbedded SnO<sub>2</sub> layer with a thickness of about 6 nm is composed of numerous ultrasmall SnO<sub>2</sub> nanocrystals. The inner hollow carbon core, which derived from the pyrolysis of solid carbon source (citric acid), can be recognized from the C element line scanning image in Fig. S3d and its thickness is about 4 nm.

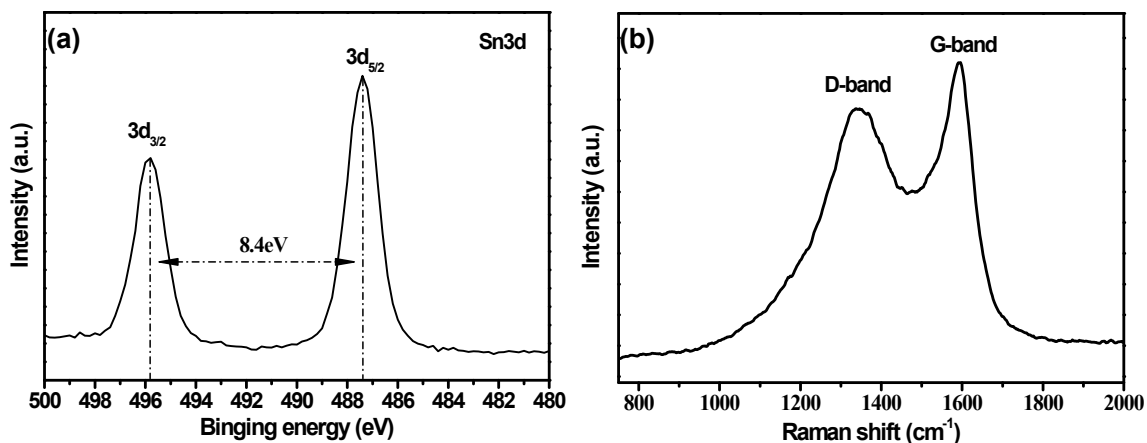

Fig. S4. (a) XPS spectra of Sn3d peaks and (b) Raman spectrum of C@SnO<sub>2</sub>@C

HNSs.

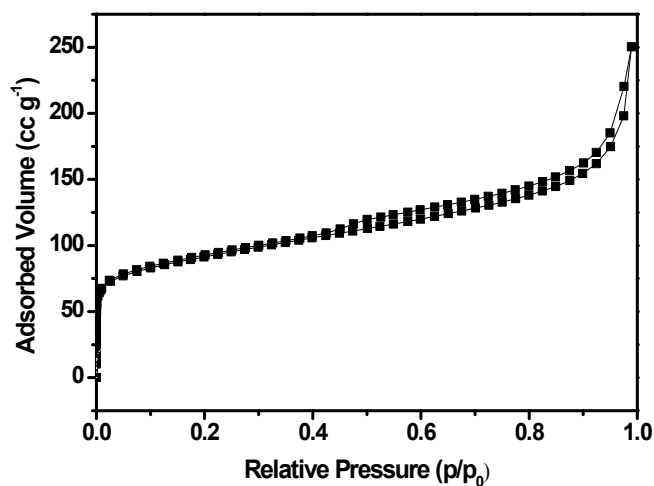

Fig. S5. Nitrogen adsorption–desorption isotherms of C@SnO<sub>2</sub> composites.

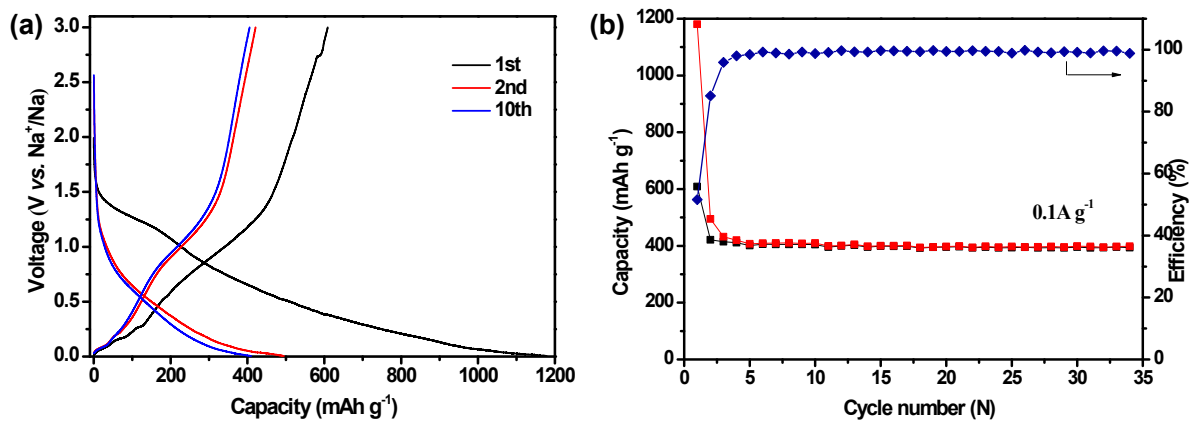



Fig. S6. (a) Galvanostatic charge–discharge voltage profiles plotted for the first, second and 10th cycles of the C@SnO<sub>2</sub>@C HNS electrode for SIB anode at a current density of 0.1 A g<sup>-1</sup>. (b) Cycling performance of the C@SnO<sub>2</sub>@C HNS electrode for SIB anode at a current density of 0.1 A g<sup>-1</sup>.

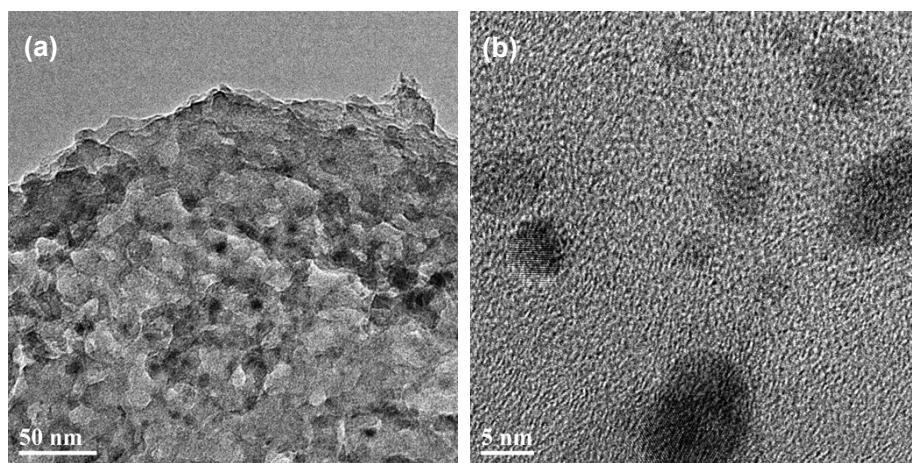

Fig. S7. (a) TEM and (b) HRTEM image of C@SnO<sub>2</sub>@C HNSs as a LIB anode after 1000 cycles at 10 A g<sup>-1</sup>.

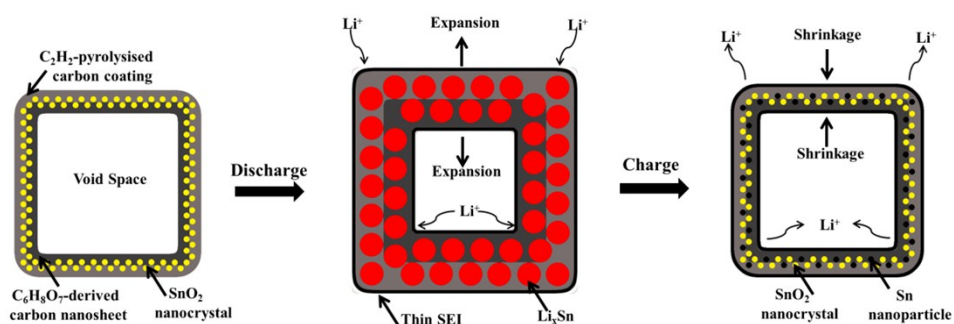

Fig. S8. Schematic illustration of a C@SnO<sub>2</sub>@C HNS for lithium storage processes. Sodium storage processes of the nanostructures like the case of lithium storage processes.

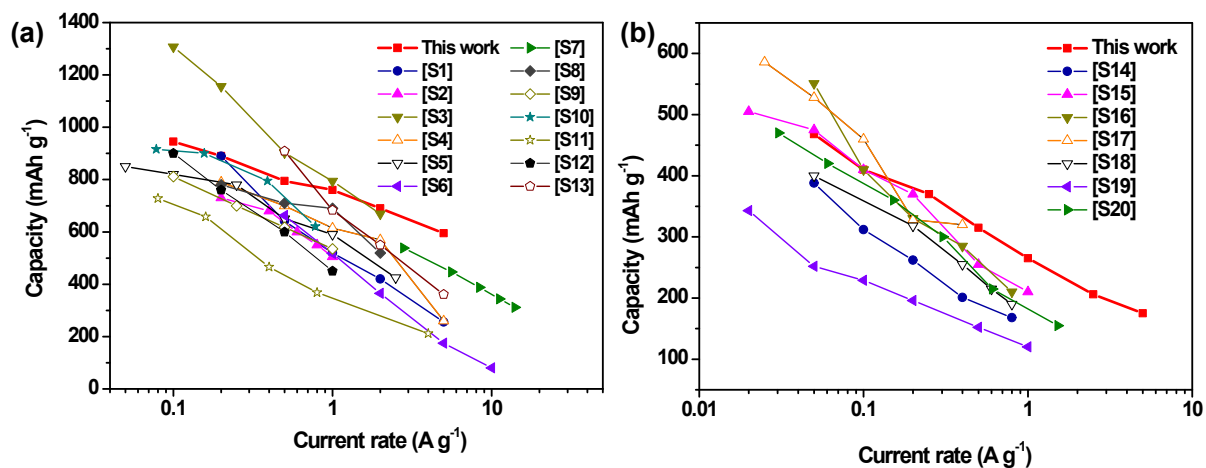

Fig. S9. (a) Comparison of rate capacity of C@SnO<sub>2</sub>@C HNS electrode for LIB anode with those of representative SnO<sub>2</sub>/C composite anodes previously reported. (b) Comparison of rate capacity of C@SnO<sub>2</sub>@C HNS electrode for SIB anode with those of representative SnO<sub>2</sub>/C composite anodes previously reported.

Table S1. Comparison of specific lithium storage capacity and capacity retention at different current densities for C@SnO<sub>2</sub>@C HNS electrode with those of the representative previously reported SnO<sub>2</sub>/C composite anodes.

| Materials                                         | Current density (A g <sup>-1</sup> ) | Cycle number | Specific capacity (mAh g <sup>-1</sup> ) | Capacity retention (%) |
|---------------------------------------------------|--------------------------------------|--------------|------------------------------------------|------------------------|
| C@SnO <sub>2</sub> @C HNSs<br>[this work]         | 0.1                                  | 50           | 933                                      | 92                     |
|                                                   | 5                                    | 1000         | 550                                      | 95                     |
|                                                   | 10                                   | 1000         | 285                                      | 92                     |
| Carbon-coated SnO <sub>2</sub> submicroboxes [S1] | 0.5                                  | 100          | 491                                      | 50                     |
| Carbon-coated SnO <sub>2</sub> nanoplates [S2]    | 0.2                                  | 50           | 700                                      | 80                     |
| Carbon-coated hierarchical                        | 0.1                                  | 50           | 920                                      | 75                     |

|                                                                                 |       |      |       |    |
|---------------------------------------------------------------------------------|-------|------|-------|----|
| SnO <sub>2</sub> hollow spheres <sup>[S3]</sup>                                 |       |      |       |    |
| 2D graphene/ SnO <sub>2</sub> @C <sup>[S4]</sup>                                | 0.2   | 100  | 800   | 90 |
| Carbon-encapsulated porous SnO <sub>2</sub> <sup>[S5]</sup>                     | 0.5   | 200  | 516   | 81 |
| SnOx/carbon nanohybrids <sup>[S6]</sup>                                         | 0.5   | 200  | 608   | 86 |
| Ultrasmall SnO <sub>2</sub> confined in micro/mesoporous carbon <sup>[S7]</sup> | 1.4   | 2000 | 443   | 75 |
| SnO <sub>2</sub> /graphene composites <sup>[S8]</sup>                           | 0.1   | 200  | 872   | 85 |
| Reduced GO/SnO <sub>2</sub> nanocomposites <sup>[S9]</sup>                      | 0.1   | 200  | 718   | 72 |
|                                                                                 | 0.5   | 200  | 514   | 70 |
| Graphene-based mesoporous SnO <sub>2</sub> composite <sup>[S10]</sup>           | 0.782 | 50   | 847.5 | 78 |
| Graphene/SnO <sub>2</sub> composite <sup>[S11]</sup>                            | 0.08  | 120  | 591.9 | 60 |
| SnO <sub>2</sub> @C nanocomposites <sup>[S12]</sup>                             | 0.1   | 200  | 880   | 86 |
| SnO <sub>2</sub> /carbon nanotubes <sup>[S13]</sup>                             | 0.5   | 200  | 602   | 64 |

Table S2. Comparison of specific sodium storage capacity and capacity retention at different current densities for C@SnO<sub>2</sub>@C HNSs electrode with those of representative SnO<sub>2</sub>/carbon composite anodes reported previously.

| Materials                                              | Current density (A g <sup>-1</sup> ) | Cycle number | Specific capacity (mAh g <sup>-1</sup> ) | Capacity retention (%) |
|--------------------------------------------------------|--------------------------------------|--------------|------------------------------------------|------------------------|
| <b>C@SnO<sub>2</sub>@C HNSs</b><br><b>[this work]</b>  | <b>0.1</b>                           | <b>30</b>    | <b>405</b>                               | <b>97%</b>             |
|                                                        | <b>4.6</b>                           | <b>3000</b>  | <b>200</b>                               | <b>90</b>              |
| SnO <sub>2</sub> /graphene composites <sup>[S14]</sup> | 0.05                                 | 70           | 297                                      | 79                     |



|                                                                        |       |     |     |      |
|------------------------------------------------------------------------|-------|-----|-----|------|
| SnO <sub>2</sub> particles dispersed between graphene nanosheets [S15] | 0.5   | 100 | 260 | 82   |
| SnO <sub>2</sub> nanoparticles embedded in 3D graphene [S16]           | 0.1   | 200 | 432 | 85.7 |
| SnO <sub>2</sub> @N-doped carbon@SnO <sub>2</sub> nanotubes [S17]      | 0.025 | 50  | 492 | 72   |
| SnO <sub>2</sub> @void@C porous nanowires [S18]                        | 0.2   | 100 | 308 | 83   |
| Sn/SnO <sub>2</sub> /C composites [S19]                                | 0.02  | 100 | 245 | 78   |
| Carbon encapsulated SnO <sub>2</sub> nanocomposites [S20]              | 0.152 | 200 | 360 | 80   |

## References

- [S1] X. S. Zhou, L. Yu, X. W. Lou, *Adv. Energy Mater.* **2016**, 1600451.
- [S2] L. Zhang, G. Zhang, H. Wu, L. Yu, X. Lou, *Adv. Mater.* **2013**, *25*, 2589.
- [S3] Q. N. Liu, Y. H. Dou, B. Y. Ruan, Z. Q. Sun, S. L. Chou, S. X. Dou. *Chem. Eur. J.* **2016**, *22*, 5853.
- [S4] Y. Su, S. Li, D. Wu, F. Zhang, H. Liang, P. Gao, C. Cheng, X. Feng, *ACS Nano* **2012**, *6*, 8349.
- [S5] B. Huang, X. H. Li, Y. Pei, S. Li, X. Cao, R. C. Massé, G. Z. Cao, *Small* **2016**, *12*, 1945.
- [S6] X. S. Zhou, Z. H. Dai, S. H. Liu, J. C. Bao, Y. G. Guo, *Adv. Mater.* **2014**, *26*, 3943.
- [S7] A. Jahel, C. M. Ghimbeu, L. Monconduit, C. Vix-Guterl, *Adv. Energy Mater.* **2014**, *4*, 1400025.
- [S8] S. J. R. Prabakar, Y. H. Hwang, E. G. Bae, S. Shim, D. Kim, M. S. Lah, K. S. Sohn, M. Pyo, *Adv. Mater.* **2013**, *25*, 3307.

- [S9] L. Wang, D. Wang, Z. H. Dong, F. X. Zhang, J. Jin, *Nano Lett.* **2013**, *13*, 1711.
- [S10] S. Yang, W. Yue, J. Zhu, Y. Ren, X. J. Yang, *Adv. Funct. Mater.* **2013**, *23*, 3570.
- [S11] J. Zhu, G. H. Zhang, X. Z. Yu, Q. H. Li, B. A. Lu, Z. Xu, *Nano Energy* **2014**, *3*, 80.
- [S12] M. H. Wang, H. Yang, X. L. Zhou, W. Shi, Z. Zhou, P. Cheng, *Chem. Commun.* **2016**, *52*, 717.
- [S13] X. S. Zhou, L. Yu, X. W. Lou, *Nanoscale* **2016**, *8*, 8384.
- [S14] L. L. Fan, X. F. Li, B. Yan, J. M. Feng, D. B. Xiong, D. J. Li, L. Gu, Y. R. Wen, S. Lawes, X. L. Sun, *Adv. Energy Mater.* **2016**, 1502057.
- [S15] J. Patra, H. C. Chen, C. H. Yang, C. T. Hsieh, C. Y. Su, J. K. Chang, *Nano Energy* **2016**, *28*, 124.
- [S16] L. Pei, Q. Jin, Z. Zhu, Q. Zhao, J. Liang, J. Chen, *Nano Res.* **2015**, *8*, 184.
- [S17] J. Yue, W. P. Wang, N. N. Wang, X. F. Yang, J. K. Feng, J. Yang, Y. T. Qian, *J. Mater. Chem. A* **2015**, *3*, 23194.
- [S18] H.Z. Li, L.Y. Yang, 1, J. Liu, S.T. Li, L.B. Fang, Y.K. Lu, H.R. Yang, S.L. Liu, M. Lei, *J. Power Sources* **2016**, *324*, 780.
- [S19] Y. Y. Cheng, J. F. Huang, J. Y. Li, Z. W. Xu, L. Y. Cao, H. Qi, *J. Power Sources* **2016**, *324*, 447.
- [S20] R. S. Kalubarme, J. Y. Lee, C. J. Park, *ACS Appl. Mater. Interfaces* **2015**, *7*, 17226.
